# Supplementary material for: Catalytic selectivity of Rh/TiO2catalyst in syngas conversion to ethanol: probing into the mechanism and functions of TiO2support and promoter
Source: Royal Society of Chemistry journal article supplement (doi:10.1039/c6cy02350a), 2017-01-01
Supplement: c6cy02350a1.pdf [file c6cy02350a1.pdf]

## Supplementary material

### Catalytic Selectivity of Rh/TiO<sub>2</sub> Catalyst in Syngas Conversion to Ethanol: Probing into the Mechanism, Functions of Support TiO<sub>2</sub> and Promoter

Riguang Zhang Mao Peng Baojun Wang\*

*Key Laboratory of Coal Science and Technology of Ministry of Education and Shanxi Province, Taiyuan University of Technology, Taiyuan 030024, Shanxi, P.R. China*

**Part 1. All possible structures of Pt heptamer clusters, Stable configurations of the adsorbed species, and the potential energy profile of CH<sub>x</sub>(x=1~3) and CH<sub>3</sub>OH formation.**

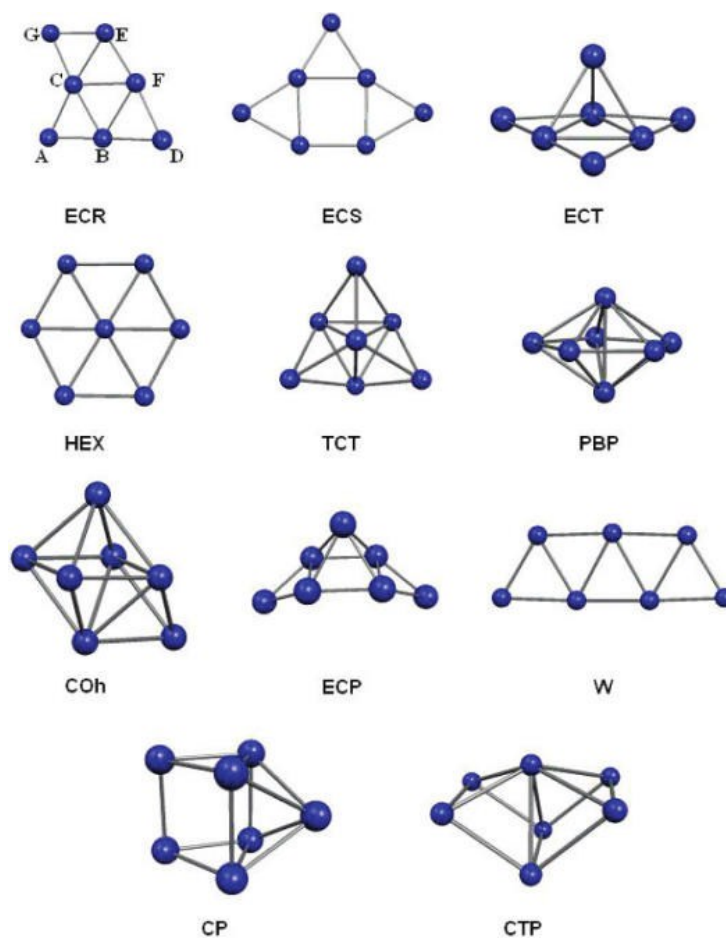

**Figure S1** Structures of Rh heptamer clusters

\* Corresponding author at: No. 79 Yingze West Street, Taiyuan 030024, China. Tel.: +86 351 6018239; Fax: +86 351 6041237 E-mail address: [quantumtyut@126.com](mailto:quantumtyut@126.com); [wangbaojun@tyut.edu.cn](mailto:wangbaojun@tyut.edu.cn) (Baojun Wang)

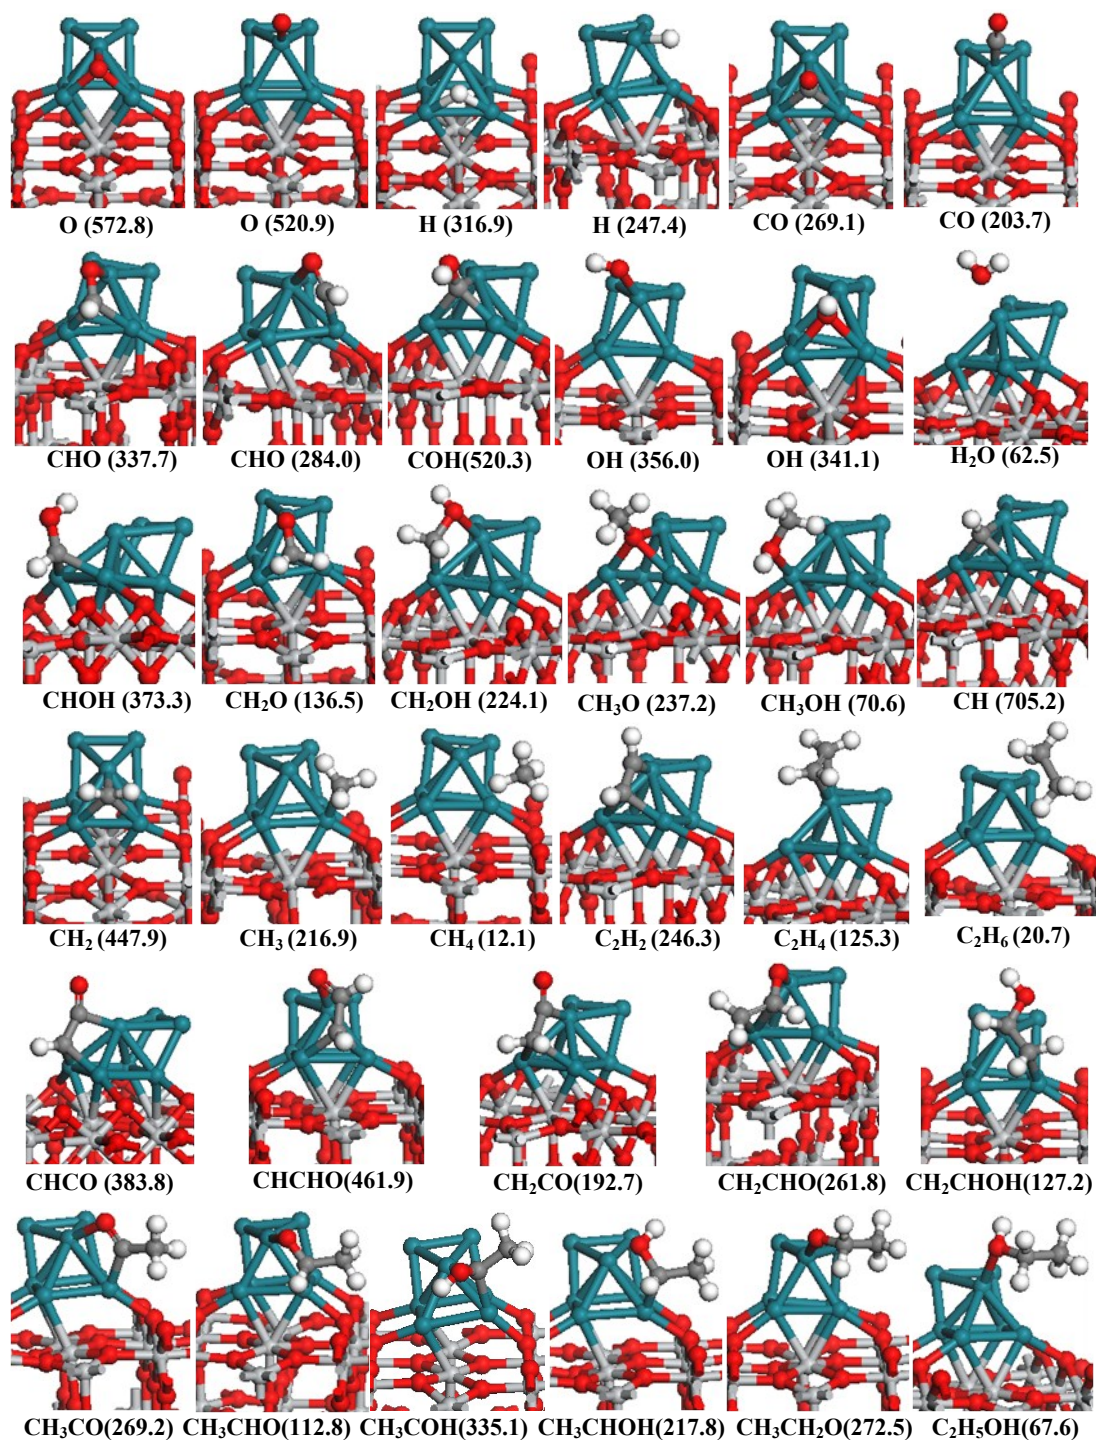

**Figure S2** The stable configurations and adsorption energies of all possible species involved in ethanol synthesis from syngas. C, O, H, Ti and Rh atoms are shown in the grey, red, white, light grey and dark cyan balls, respectively. The values in parenthesis are adsorption energies with the unit in  $\text{kJ}\cdot\text{mol}^{-1}$ .

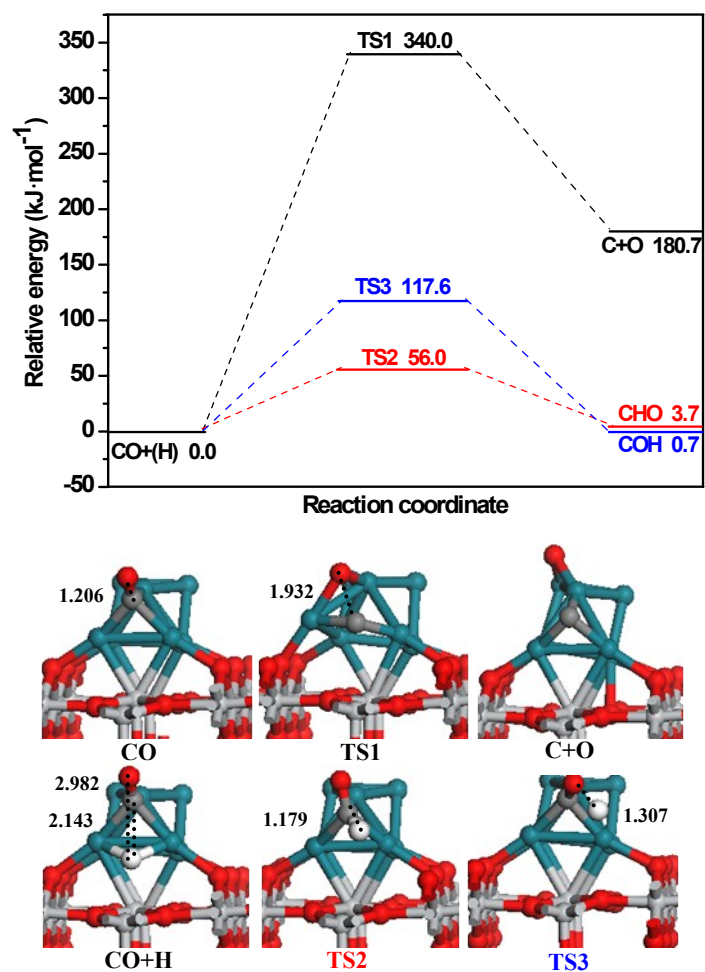

**Figure S3** The potential energy profile of CO initial step together with initial states (ISs), transition states (TSs) and final states (FSs). Bond lengths are in Å. See Figure S2 for color coding.

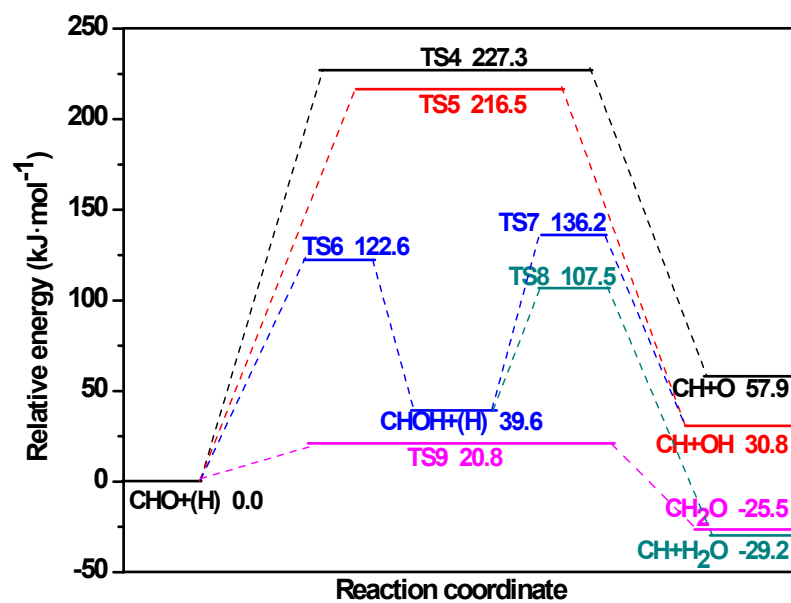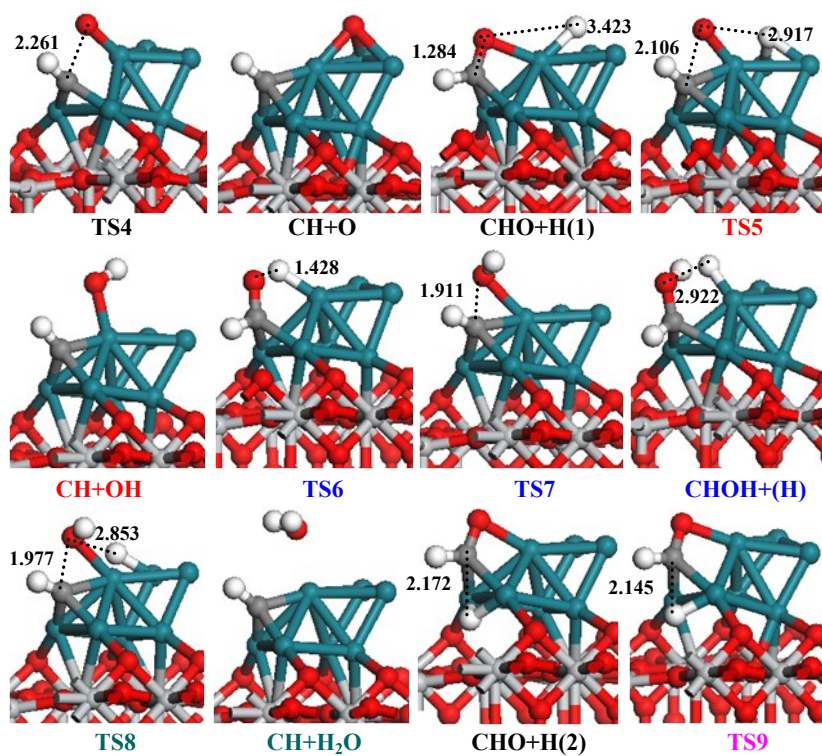

**Figure S4** The potential energy profile of CH and CH<sub>2</sub>O formations together with ISs, TSs and FSs. Bond lengths are in Å. See Figure S2 for color coding.



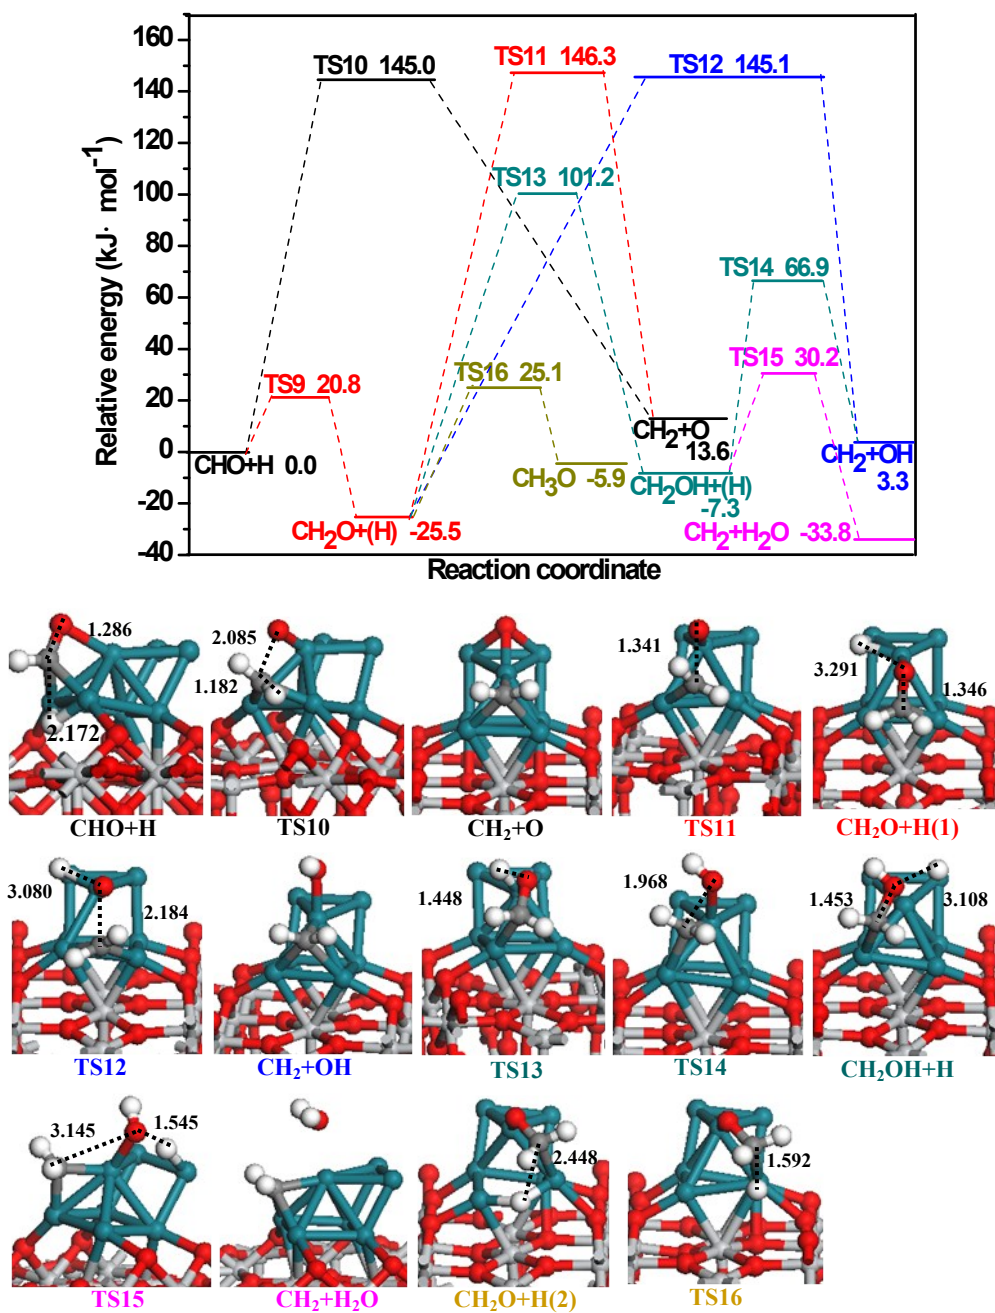

**Figure S5** The potential energy profile of CH<sub>2</sub> and CH<sub>3</sub>O formations together with ISs, TSs and FSs. Bond lengths are in Å. See Figure S2 for color coding.

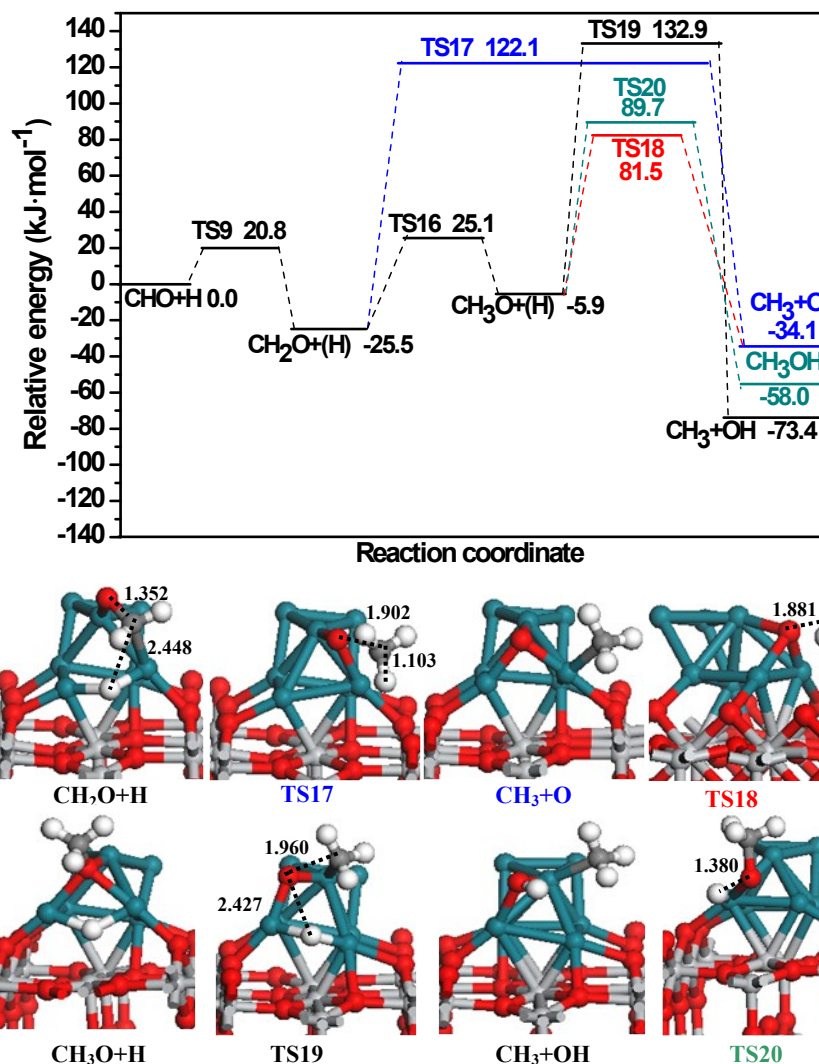

**Figure S6** The potential energy profile of CH<sub>3</sub> and CH<sub>3</sub>OH formations together with ISs, TSs and FSs. Bond lengths are in Å. See Figure S2 for color coding.

## Part 2. The reactions related to CH<sub>2</sub> and CH species, as well as ethanol formation

As mentioned in the main text, due to easy formation of CH<sub>2</sub> by CH<sub>3</sub> dissociation, all reactions related to CH<sub>2</sub> species (**R26-R30**) have been investigated (see Figure S7), our results show that starting from CH<sub>2</sub> species, CH<sub>2</sub> hydrogenation to CH<sub>3</sub> is the most favorable, which have the activation energy and reaction energy of 24.1 and -11.2 kJ·mol<sup>-1</sup>, respectively; the second is CH<sub>2</sub> dissociation to CH, which have the activation energy and reaction energy of 40.1 and 26.6 kJ·mol<sup>-1</sup>, respectively; the third is CHO insertion into CH<sub>2</sub> to CH<sub>2</sub>CHO, which have the activation energy and reaction energy of 84.0 and -8.0 kJ·mol<sup>-1</sup>, respectively.

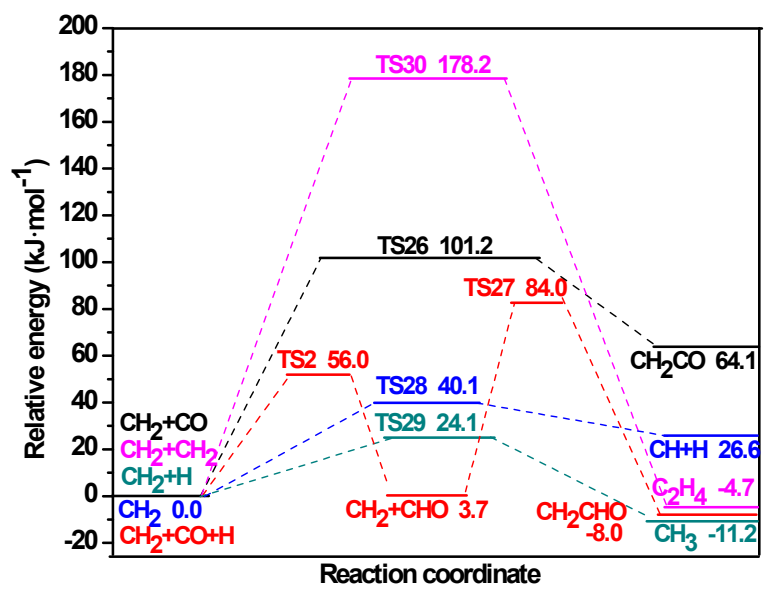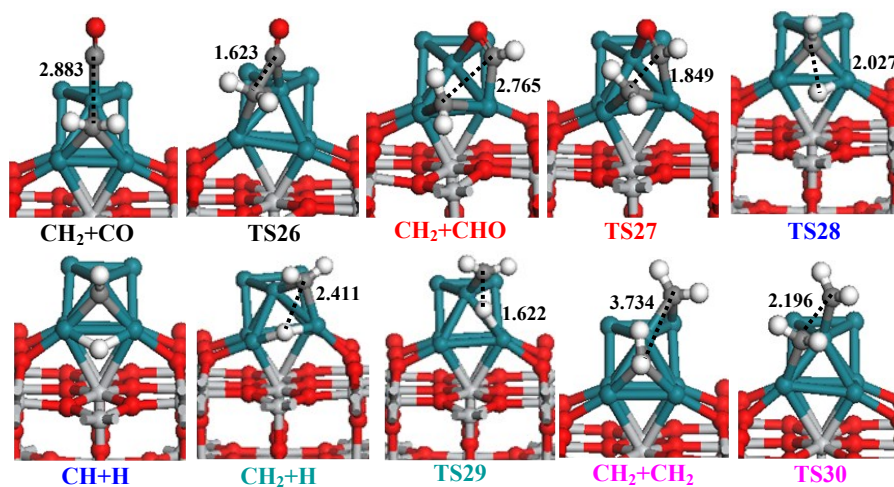

**Figure S7** The potential energy profile of these reactions related to CH<sub>2</sub> species together with ISs, TSs and FSs.

Bond lengths are in Å. See Figure S2 for color coding in the main text.

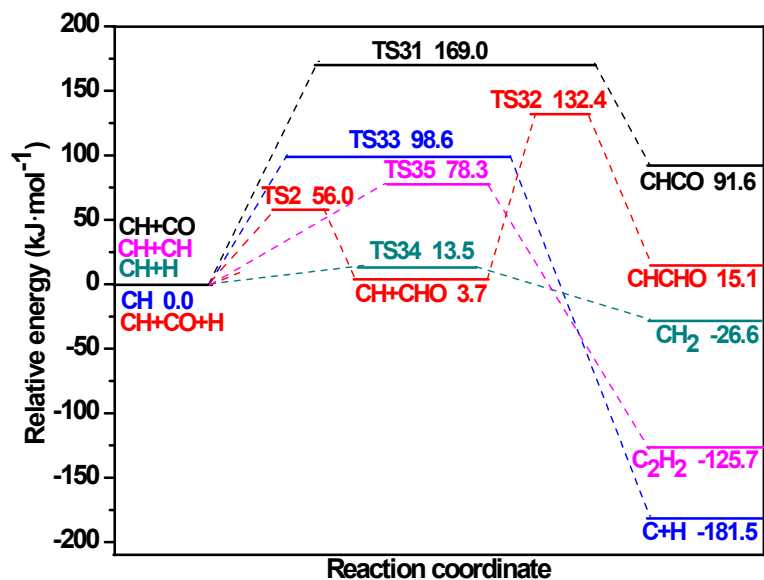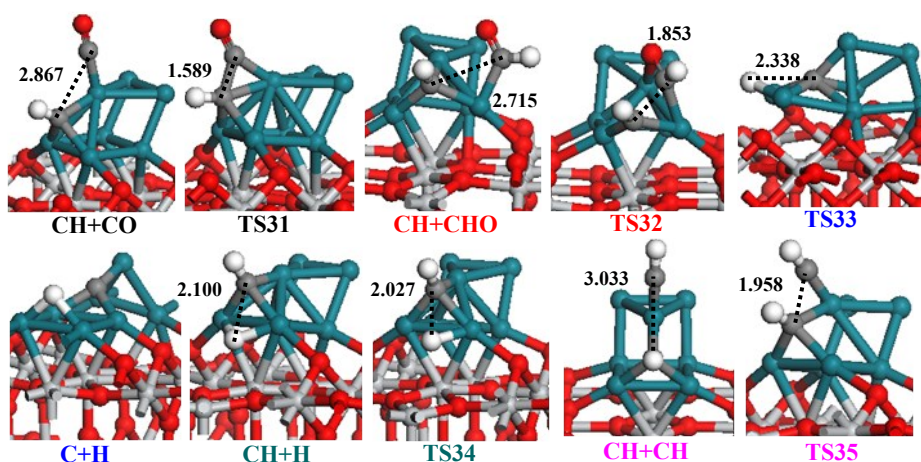

**Figure S8** The potential energy profile of these reactions related to CH species together with ISs, TSs and FSs. Bond lengths are in Å. See Figure S2 for color coding in the main text.

On the other hand, all reactions related to CH species (**R31-R35**) have also been examined (see Figure S8), suggesting that CH prefers to be hydrogenated to CH<sub>2</sub>, which have the activation energy and reaction energy of 13.5 and -26.6 kJ·mol<sup>-1</sup>, respectively; the second is CH coupling, which have the activation energy and reaction energy of 78.3 and -125.7 kJ·mol<sup>-1</sup>, respectively; CHO or CO insertion into CH to C<sub>2</sub> oxygenates are difficult to occur.

Further, it is noted that starting from CH<sub>3</sub> species, CH and CH<sub>2</sub> can be easily formed, however, among all reactions related to CH and CH<sub>2</sub> species, CH and CH<sub>2</sub> prefers to be hydrogenated to CH<sub>2</sub> and CH<sub>3</sub>, respectively, which means that once CH and CH<sub>2</sub> species are formed, both prefer to be



hydrogenated to  $\text{CH}_3$ . Therefore,  $\text{CH}_3$  species is the most favorable  $\text{CH}_x$  monomer on Rh/TiO<sub>2</sub> catalyst, which is dominantly responsible for C<sub>2</sub> oxygenates formation.

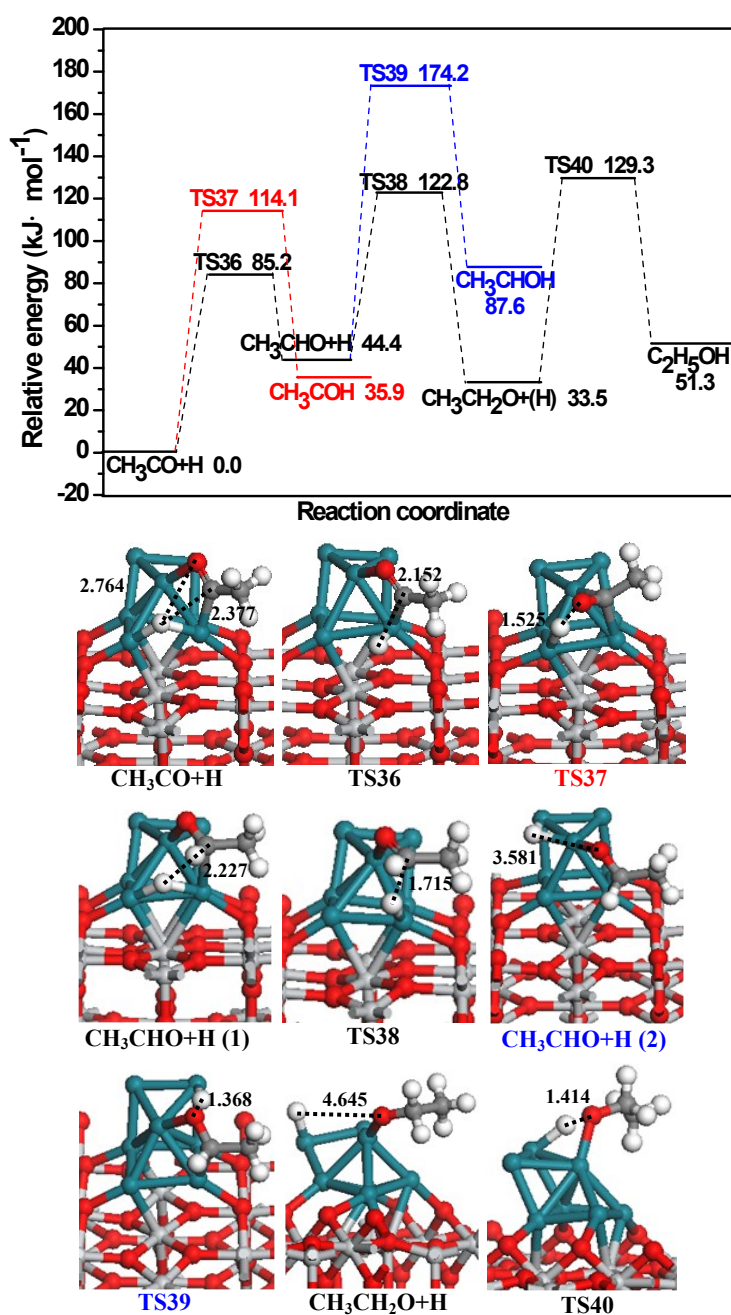

**Figure S9** The potential energy profile of ethanol formation starting from  $\text{CH}_3\text{CO}$  successive hydrogenation together with ISs, TSs and FSs. Bond lengths are in Å. See Figure 2 for color coding.

### Part 3. Rate constant calculations

In this study, the rate constants of all elementary reactions involved in ethanol synthesis from syngas at different temperatures have been calculated to further understand the effect of reaction

temperature on the kinetic of ethanol, methanol and methane formations on Rh/TiO<sub>2</sub> catalyst. Previous studies has reported that Rh-based catalysts exhibit a good catalytic activity toward C<sub>2</sub> oxygenates, where the reaction temperature ranges from 563 to 593 K.<sup>1-3</sup> Hence, the rate constants of all elementary reactions at T=500, 525, 550, 575, 600, 625 K have been considered, respectively.

On the basis of the harmonic Transition State Theory (TST), the rate constant can be obtained using the Eq. (1):<sup>4,5</sup>

$$k = \frac{k_B T}{h} \frac{q_{TS}}{q_{React}} \exp\left(-\frac{E_a}{RT}\right) \quad (1)$$

Here  $k_B$  is the Boltzmann constant,  $h$  is the Planck constant,  $T$  is the absolute temperature,  $E_a$  is the zero-point-corrected energy difference between the transition state and the co-adsorbed reactants. The partition functions ( $q$ ) are calculated in the harmonic model in Eq. (2), where  $\nu$  is the vibrational frequency.

$$q = \frac{1}{\sum_{i=1}^{Vibrations} 1 - \exp\left(-\frac{h\nu_i}{k_B T}\right)} \quad (2)$$

The zero-point-corrected activation energy ( $E_a$ ) is determined from Eqs. (3) and (4):<sup>5,6</sup>

$$E_a = (E_{TS} - E_{IS}) + \Delta ZPE_{barrier} \quad (3)$$

Where  $E_{TS}$  corresponds to the TS energy,  $E_{IS}$  refers to the reactant energy, and  $\Delta ZPE_{barrier}$  refers to ZPE correction. For the co-adsorbed reactants, the reactant energy ( $E_{IS}$ ) is calculated as the sum of individual BEs. ZPE correction for the activation energy is determined from the Eq. (4).

$$\Delta ZPE_{barrier} = \left( \sum_{i=1}^{Vibrations} \frac{h\nu_i}{2} \right)_{TS} - \left( \sum_{i=1}^{Vibrations} \frac{h\nu_i}{2} \right)_{IS} \quad (4)$$

Aiming at providing more accurate energies for the kinetic modeling, the activation energy with ZPE-corrected has been considered, which vary slightly from those without ZPE-corrected. According to above formulas, the rate constants of all elementary reaction involved in ethanol from syngas have been calculated, and the corresponding results are listed in Table S1.

**Table S1** The partial elementary reactions involved in ethanol synthesis from syngas together with the ZPE-corrected activation energies ( $E_a'$ ) and rate constants.

| Elementary reactions                                                 | $E_a'$ /(kJ/mol) |          | Rate constant (T/K)  |                      |                      |                      |                      |                      |
|----------------------------------------------------------------------|------------------|----------|----------------------|----------------------|----------------------|----------------------|----------------------|----------------------|
|                                                                      |                  |          | 500                  | 525                  | 550                  | 575                  | 600                  | 625                  |
| CO+H→CHO                                                             | 57.6             | $k_1$    | $1.44\times 10^7$    | $2.94\times 10^7$    | $5.67\times 10^7$    | $1.03\times 10^8$    | $1.79\times 10^8$    | $2.98\times 10^8$    |
| CHO+H→CH <sub>2</sub> O                                              | 20.1             | $k_2$    | $7.82\times 10^{10}$ | $1.04\times 10^{11}$ | $1.36\times 10^{11}$ | $1.73\times 10^{11}$ | $2.17\times 10^{11}$ | $2.68\times 10^{11}$ |
| CH <sub>2</sub> O+H→CH <sub>3</sub> O                                | 51.2             | $k_3$    | $4.02\times 10^7$    | $7.63\times 10^7$    | $1.37\times 10^8$    | $2.34\times 10^8$    | $3.84\times 10^8$    | $6.06\times 10^8$    |
| CH <sub>3</sub> O→CH <sub>3</sub> +O                                 | 80.5             | $k_4$    | $6.59\times 10^4$    | $1.79\times 10^5$    | $4.45\times 10^5$    | $1.03\times 10^6$    | $2.22\times 10^6$    | $4.52\times 10^6$    |
| CH <sub>3</sub> O+H→CH <sub>3</sub> OH                               | 94.7             | $k_5$    | $4.24\times 10^3$    | $1.33\times 10^4$    | $3.79\times 10^4$    | $9.84\times 10^4$    | $2.37\times 10^5$    | $5.32\times 10^5$    |
| CH <sub>3</sub> +CO→CH <sub>3</sub> CO                               | 108.2            | $k_6$    | $3.39\times 10^1$    | $1.21\times 10^2$    | $3.86\times 10^2$    | $1.11\times 10^3$    | $2.94\times 10^3$    | $7.21\times 10^3$    |
| CH <sub>3</sub> +H→CH <sub>4</sub>                                   | 74.8             | $k_7$    | $2.40\times 10^5$    | $5.97\times 10^5$    | $1.37\times 10^6$    | $2.94\times 10^6$    | $5.92\times 10^6$    | $1.13\times 10^7$    |
| CH <sub>3</sub> CO+H→CH <sub>3</sub> CHO                             | 82.4             | $k_8$    | $2.30\times 10^4$    | $6.26\times 10^4$    | $1.56\times 10^5$    | $3.59\times 10^5$    | $7.74\times 10^5$    | $1.57\times 10^5$    |
| CH <sub>3</sub> CHO+H→CH <sub>3</sub> CH <sub>2</sub> O              | 76.7             | $k_9$    | $2.91\times 10^4$    | $7.43\times 10^4$    | $1.75\times 10^5$    | $3.83\times 10^5$    | $7.89\times 10^5$    | $1.53\times 10^6$    |
| CH <sub>3</sub> CH <sub>2</sub> O+H→C <sub>2</sub> H <sub>5</sub> OH | 100.3            | $k_{10}$ | $1.34\times 10^3$    | $4.38\times 10^3$    | $1.29\times 10^4$    | $3.47\times 10^4$    | $8.58\times 10^4$    | $1.98\times 10^5$    |
| O+H→OH                                                               | 62.8             | $k_{11}$ | $3.44\times 10^6$    | $7.48\times 10^6$    | $1.52\times 10^7$    | $2.92\times 10^7$    | $5.31\times 10^7$    | $9.22\times 10^7$    |
| OH+H→H <sub>2</sub> O                                                | 99.4             | $k_{12}$ | $5.75\times 10^2$    | $1.89\times 10^3$    | $5.62\times 10^3$    | $1.52\times 10^4$    | $3.78\times 10^4$    | $8.76\times 10^4$    |

#### Part 4. Microkinetic Modeling

In this study, the microkinetic modeling technique has been employed to investigate the catalytic activity and selectivity of major products in ethanol synthesis from syngas on Rh/TiO<sub>2</sub> catalyst, in which the method applied has been widely employed in the previous studies.<sup>2,7,8</sup> The adsorption process of syngas is assumed to be in equilibrium. Meanwhile, all elementary reactions involved in the microkinetic modeling have been summarized in Table S1.

For the microkinetic modeling in syngas conversion, the adsorption processes of CO and H<sub>2</sub> are assumed to be in equilibrium. Moreover, the pseudo-steady-state approximation<sup>8</sup> is applied to other minority species on the catalyst surface, namely, the production rates and the consumption rates of all species involved are thought to be the same. The equilibrium constants for H<sub>2</sub> and CO adsorption are estimated according to the formula:

$$K = \exp[-(\Delta E_{ads} - T\Delta S) / RT] \quad (5)$$

Here  $\Delta E_{ads}$  is the adsorption energy of adsorbate,  $\Delta S$  is the entropy change of gas-phase adsorbate, which can be obtained from NIST Chemistry WebBook.<sup>9</sup> While  $R$  is the fundamental gas constant,  $T$  is the reaction temperature.

The site balance of all intermediate species involved in the reaction mechanism can be described in terms of coverage ( $\theta_x$ ,  $x$ =surface species), as presented in Eq. (6):

$$\theta_{CO} + \theta_H + \theta_{CHO} + \theta_{CH_2O} + \theta_{CH_3O} + \theta_{CH_3} + \theta_{CH_3CO} + \theta_{CH_3CHO} + \theta_{CH_3CH_2O} + \theta_O + \theta_{OH} + \theta_* = 1 \quad (6)$$

The coverage of  $H_2$  and  $CO$  are  $\theta_H = (P_{H_2}K_2)^{1/2}\theta_*$  and  $\theta_{CO} = P_{CO}K_3\theta_*$ , respectively. Other involved surface species can be described according to the steady-state approximation as summarized below,<sup>8</sup> where the rates of production and consumption are considered to be the same.

$$\text{CO: } \theta_{CO} = P_{CO}K_1\theta_*$$

$$\text{H: } \theta_H = P_{H_2}^{1/2}K_2^{1/2}\theta_*$$

$$\text{CHO: } \frac{d\theta_{CHO}}{dt} = k_1\theta_{CO}\theta_H - k_2\theta_{CHO}\theta_H = 0$$

$$\text{CH}_2\text{O: } \frac{d\theta_{CH_2O}}{dt} = k_2\theta_{CHO}\theta_H - k_3\theta_{CH_2O}\theta_H = 0$$

$$\text{CH}_3\text{O: } \frac{d\theta_{CH_3O}}{dt} = k_3\theta_{CH_2O}\theta_H - k_4\theta_{CH_3O}\theta_* - k_5\theta_{CH_3O}\theta_H = 0$$

$$\text{CH}_3: \frac{d\theta_{CH_3}}{dt} = k_4\theta_{CH_3O}\theta_* - k_6\theta_{CH_3}\theta_{CO} - k_7\theta_{CH_3}\theta_H = 0$$

$$\text{CH}_3\text{CO: } \frac{d\theta_{CH_3CO}}{dt} = k_6\theta_{CH_3}\theta_{CO} - k_8\theta_{CH_3CO}\theta_H = 0$$

$$\text{CH}_3\text{CHO: } \frac{d\theta_{CH_3CHO}}{dt} = k_8\theta_{CH_3CO}\theta_H - k_9\theta_{CH_3CHO}\theta_H = 0$$

$$\text{CH}_3\text{CH}_2\text{O: } \frac{d\theta_{CH_3CH_2O}}{dt} = k_9\theta_{CH_3CHO}\theta_H - k_{10}\theta_{CH_3CH_2O}\theta_H = 0$$

$$\text{O: } \frac{d\theta_O}{dt} = k_4\theta_{CH_3O}\theta_* - k_{11}\theta_O\theta_H = 0$$



$$\text{OH: } \frac{d\theta_{OH}}{dt} = k_{10}\theta_O\theta_H - k_{12}\theta_{OH}\theta_H = 0$$

Putting all of the coverage expressions into Eq. (6), the coverage of surface free sites  $\theta_*$  can be obtained. Subsequently, the coverage of every adsorbates can be obtained.

In ethanol synthesis from syngas on Rh/TiO<sub>2</sub> catalyst, CO→CHO→CH<sub>2</sub>O→CH<sub>3</sub>O is an optimal pathway for initial CO hydrogenation; starting from CH<sub>3</sub>O intermediate, CH<sub>3</sub>OH formation goes through CH<sub>3</sub>O hydrogenation, CH<sub>3</sub> is formed by CH<sub>3</sub>O dissociation. Starting from CH<sub>3</sub> species, CH<sub>4</sub> is formed by its hydrogenation, while CO insertion into CH<sub>3</sub> is the favorable pathway to form C<sub>2</sub> oxygenate CH<sub>3</sub>CO, which will be successively hydrogenated to ethanol; moreover, CO insertion into CH<sub>3</sub> to CH<sub>3</sub>CO is the rate-controlling step of ethanol formation, as a result, the rates of C<sub>2</sub>H<sub>5</sub>OH formation is determined by CO insertion into CH<sub>3</sub> to CH<sub>3</sub>CO.

The rates for the major products CH<sub>3</sub>OH, CH<sub>4</sub> and C<sub>2</sub>H<sub>5</sub>OH are:

$$r_{CH_3OH} = k_5\theta_{CH_3O}\theta_H$$

$$r_{CH_4} = k_7\theta_{CH_3}\theta_H$$

$$r_{C_2H_5OH} \approx r_{CH_3CO} = k_6\theta_{CH_3}\theta_{CO}$$

The relative selectivity is defined by the relative rate for each product, as mentioned below, in which  $i$  is CH<sub>3</sub>OH, CH<sub>4</sub> or C<sub>2</sub>H<sub>5</sub>OH:

$$s_i = r_i / (r_{CH_3OH} + r_{CH_4} + r_{C_2H_5OH})$$

## Part 5. The Role of Promoter Fe for Fe-promoted Rh/TiO<sub>2</sub> Catalyst

Since Fe has been widely used in experiments as one of the promoters for ethanol synthesis from syngas on Rh-based catalyst,<sup>2,10-13</sup> to further validate above predictions about the role of promoter, one example has been carried out to probe into the effect of promoter Fe on Fe-promoted Rh/TiO<sub>2</sub> catalyst.

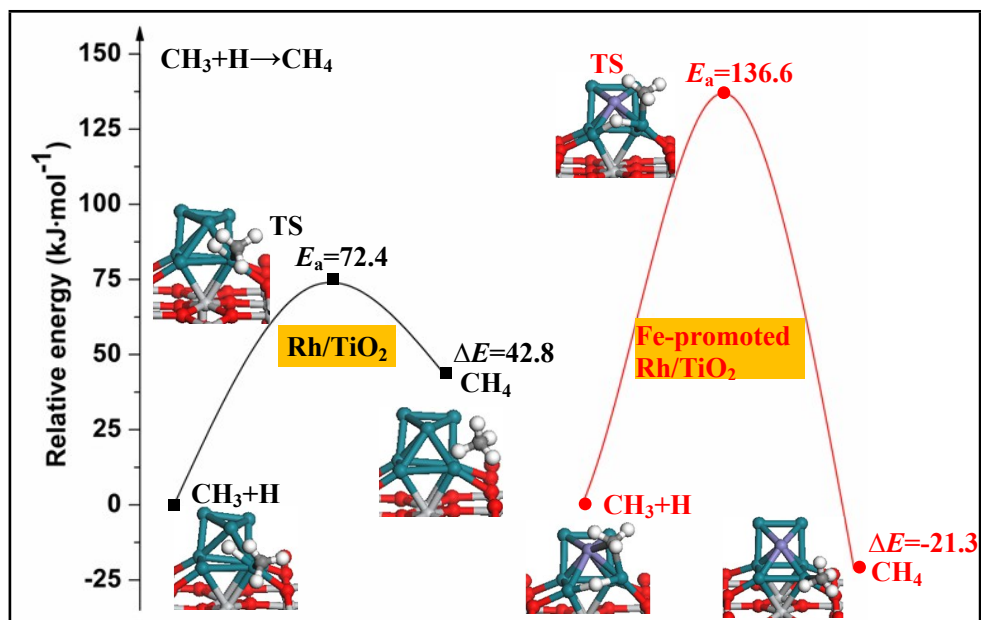

**Figure S10** Comparisons of activation energies ( $E_a/\text{kJ}\cdot\text{mol}^{-1}$ ) and reaction energies ( $\Delta E/\text{kJ}\cdot\text{mol}^{-1}$ ) for  $\text{CH}_4$  formation by  $\text{CH}_3$  hydrogenation on  $\text{Rh}/\text{TiO}_2$  and Fe-promoted  $\text{Rh}/\text{TiO}_2$  catalysts, respectively.

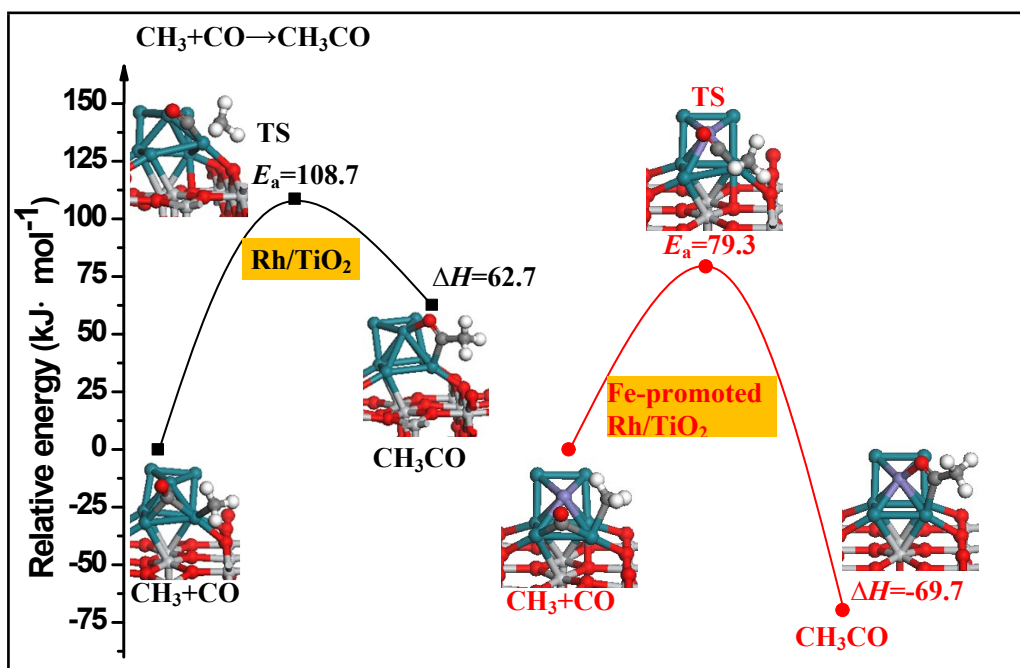

**Figure S11** Comparisons of activation energies ( $E_a/\text{kJ}\cdot\text{mol}^{-1}$ ) and reaction energies ( $\Delta H/\text{kJ}\cdot\text{mol}^{-1}$ ) for  $\text{CH}_3\text{CO}$  formation by  $\text{CO}$  insertion into  $\text{CH}_3$  on  $\text{Rh}/\text{TiO}_2$  and Fe-promoted  $\text{Rh}/\text{TiO}_2$  catalysts, respectively.

In this study, Fe is occupied as the promoter of  $\text{Rh}/\text{TiO}_2$  catalyst; for Fe-promoted  $\text{Rh}/\text{TiO}_2$  model catalyst, two types of models may exist: one is to replace a Rh atom from the topmost layer of  $\text{Rh}_7$  nanocluster by a Fe atom, as shown in Figures S10 and S11; the other is to adsorb a Fe atom

onto Rh<sub>7</sub> nanocluster. Nowadays, extensive studies about the effect of promoter on C<sub>2</sub> oxygenates formation from syngas mainly focus on the first type of model.<sup>2,14-17</sup> Thus, only the first model with a Rh atom from the topmost layer of Rh<sub>7</sub> nanocluster replaced by a Fe atom has been considered as the promoter Fe-promoted Rh/TiO<sub>2</sub> catalyst model in this study.

Our results show that on Fe-promoted Rh/TiO<sub>2</sub> catalyst, CH<sub>4</sub> formation by CH<sub>3</sub> hydrogenation is exothermic by 21.3 kJ·mol<sup>-1</sup> with an activation energy of 136.6 kJ·mol<sup>-1</sup>, which is much higher than that on Rh/TiO<sub>2</sub> catalyst by 64.2 kJ·mol<sup>-1</sup>, suggesting that the promoter Fe can suppress CH<sub>4</sub> formation upon going from Rh/TiO<sub>2</sub> to Fe-promoted Rh/TiO<sub>2</sub> catalyst (see Figure S10).

Interestingly, CO insertion into CH<sub>3</sub> to CH<sub>3</sub>CO on Fe-promoted Rh/TiO<sub>2</sub> catalyst is exothermic by 69.7 kJ·mol<sup>-1</sup> with an activation energy of 79.3 kJ·mol<sup>-1</sup>, which is much higher than that on Rh/TiO<sub>2</sub> catalyst by 29.4 kJ·mol<sup>-1</sup>, indicating that the promoter Fe can promote CH<sub>3</sub>CO formation upon going from Rh/TiO<sub>2</sub> to Fe-promoted Rh/TiO<sub>2</sub> catalyst (see Figure S11). Thus, the effect of promoter Fe is very sensitive to CH<sub>4</sub> and CH<sub>3</sub>CO formations.

**Part 6. Density of States of Rh<sub>7</sub>/TiO<sub>2</sub> and FeRh<sub>6</sub>/TiO<sub>2</sub> Catalysts, as well as the Adsorbed Species Involving in the Reactions of CH<sub>3</sub> Hydrogenation and CO Insertion into CH<sub>3</sub>**

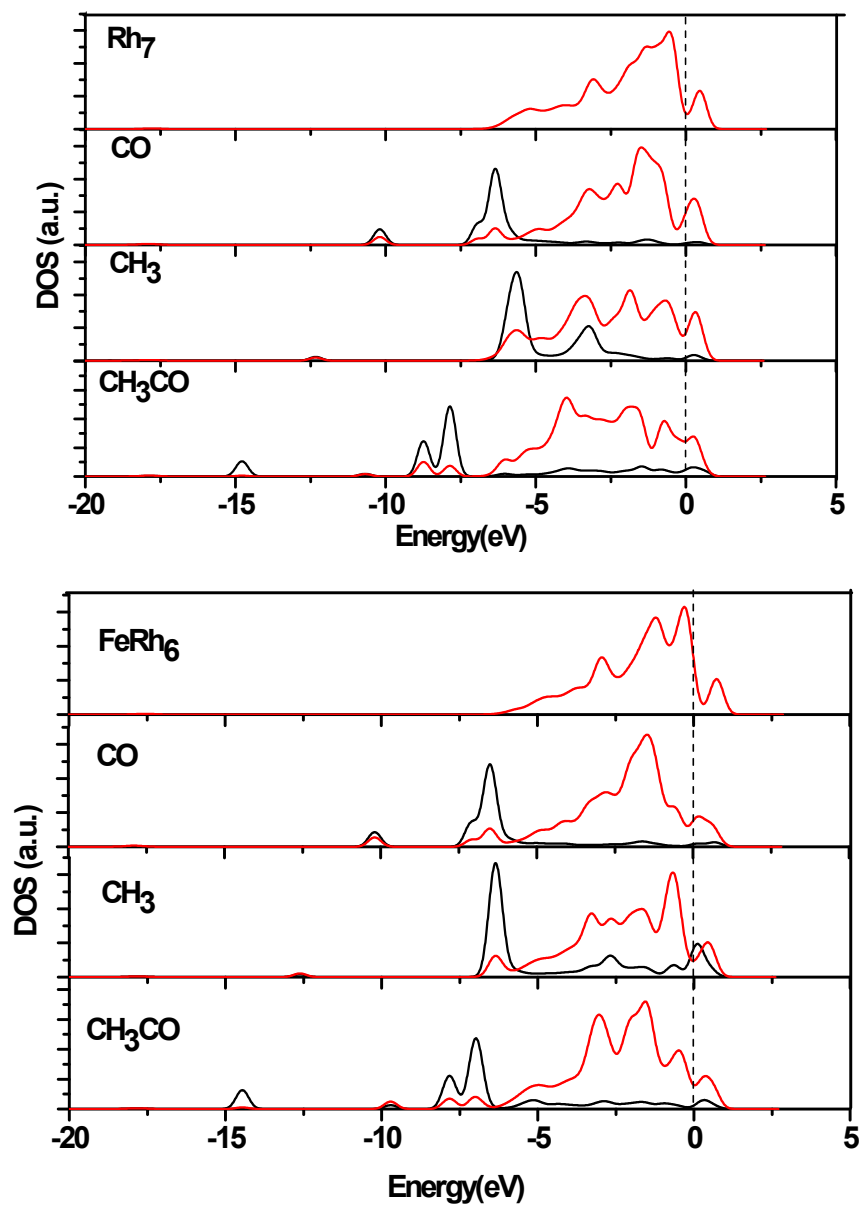

**Figure S12** Density of states for bare Rh atoms of Rh<sub>7</sub>/TiO<sub>2</sub> and FeRh<sub>6</sub>/TiO<sub>2</sub>, as well as the adsorbed CO, CH<sub>3</sub>, and CH<sub>3</sub>CO species on Rh<sub>7</sub>/TiO<sub>2</sub> and FeRh<sub>6</sub>/TiO<sub>2</sub>. The red lines denote *d*-orbital of Rh atom in Rh<sub>7</sub>/TiO<sub>2</sub> and FeRh<sub>6</sub>/TiO<sub>2</sub>, while the black lines correspond to *p*-orbital of the C atoms. The dashed line is the Fermi level.



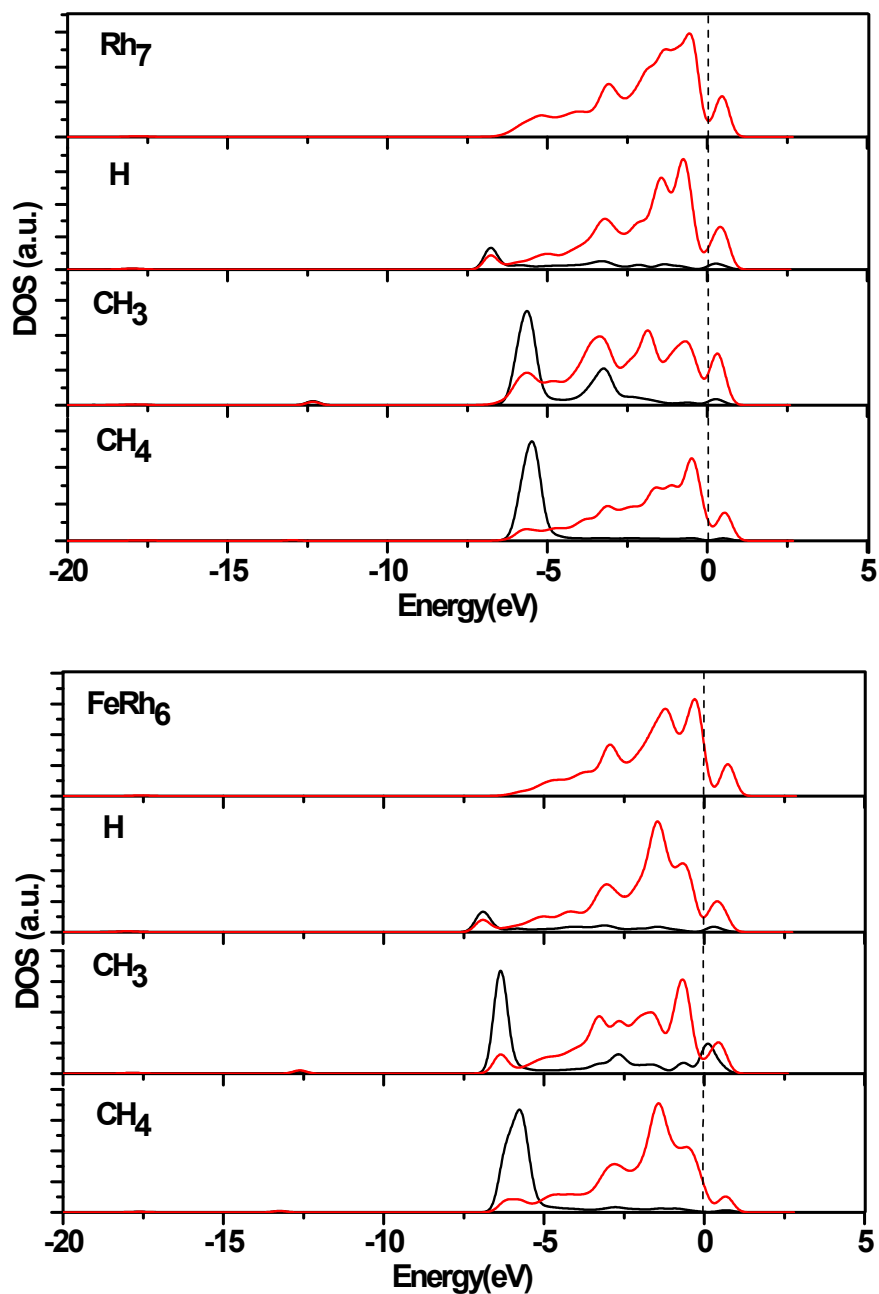

**Figure S13** Density of states for bare Rh atoms of Rh<sub>7</sub>/TiO<sub>2</sub> and FeRh<sub>6</sub>/TiO<sub>2</sub>, as well as the adsorbed H, CH<sub>3</sub>, and CH<sub>4</sub> species on Rh<sub>7</sub>/TiO<sub>2</sub> and FeRh<sub>6</sub>/TiO<sub>2</sub>. The red lines denote *d*-orbital of Rh atom in Rh<sub>7</sub>/TiO<sub>2</sub> and FeRh<sub>6</sub>/TiO<sub>2</sub>, while the black lines correspond to *p*-orbital of the C atoms. The dashed line is the Fermi level.

## References

- [1] P.Z. Lin, D.B. Liang, H.Y. Luo, C.H. Xu, H.W. Zhou, S.Y. Huang, L.W. Lin, *Appl. Catal. A: Gen.*, 1995, **131**, 207–214.
- [2] Y.M. Choi, P. Liu, *J. Am. Chem. Soc.*, 2009, **131**, 13054–13061.
- [3] W.M. Chen, Y.J. Ding, D.H. Jiang, T. Wang, H.Y. Luo, *Catal. Commun.*, 2006, **7**, 559–562.
- [4] J.P. Clay, J.P. Greeley, F.H. Ribeiro, W.N. Delgass, W.F. Schneider, *J. Catal.*, 2014, **320**, 106–117.
- [5] X. Guo, H. Liu, B. Wang, Q. Wang, R. Zhang, *RSC Adv.*, 2015, **5**, 19970–19982.
- [6] N. Kapur, J. Hyun, B. Shan, J.B. Nicholas, K. Cho, *J. Phys. Chem. C.*, 2010, **114**, 10171–10182.
- [7] P. Liu, J. A. Rodriguez, *J. Chem. Phys.*, 2007, **126**, 164705–164712.
- [8] P. Liu, A. Logadottir, J.K. Nørskov, *Electrochim. Acta*, 2003, **48**, 3731–3742.
- [9] <http://webbook.nist.gov/chemistry/>.
- [10] V. Subramani, S.K. Gangwal, *Energy Fuels*, 2008, **22**, 814–839.
- [11] J.J. Spivey, A. Egbebi, *Chem. Soc. Rev.*, 2007, **36**, 1514–1528.
- [12] M.A. Haider, M.R. Gogate, R.J. Davis, *J. Catal.*, 2009, **261**, 9–16.
- [13] A. Deluzarche, J.P. Hindermann, R. Kieffer, R. Breault, A. Kiennernann, *J. Phys. Chem.*, 1984, **88**, 4993–4995.
- [14] R.G. Zhang, G.R. Wang, B.J. Wang, *J. Catal.*, 2013, **305**, 238–255.
- [15] Y.H. Zhao, M.M. Yang, D.P. Sun, H.Y. Su, K.J. Sun, X.F. Ma, X.H. Bao, W.X. Li, *J. Phys. Chem. C*, 2011, **115**, 18247–18256.
- [16] F.Y. Li, D.E. Jiang, X.C. Zeng, Z.F. Chen, *Nanoscale*, 2012, **4**, 1123–1129.
- [17] R.G. Zhang, G.R. Wang, B.J. Wang, L.X. Ling, *J. Phys. Chem. C*, 2014, **11**, 85243–5254.
